# Supplementary material for: CRISPR and biochemical screens identify MAZ as a cofactor in CTCF-mediated insulation at Hox clusters
Source: PubMed Central journal article supplement (PMC8837555; doi:10.1038/s41588-021-01008-5), 2022-02-10
Supplement: 41588_2021_1008_MOESM1_ESM.pdf [file 41588_2021_1008_MOESM1_ESM.pdf]

---

**Supplementary information**

---

**CRISPR and biochemical screens identify  
MAZ as a cofactor in CTCF-mediated  
insulation at *Hox* clusters**

---

In the format provided by the  
authors and unedited

1  
2  
3  
4  
5  
6  
7  
8  
9  
10  
11  
12  
13  
14  
15  
16  
17  
18  
19  
20  
21  
22  
23  
24  
25  
26  
27  
28  
29  
30  
31  
32  
33

# Supplementary Materials for

## **CRISPR and biochemical screens identify MAZ as a cofactor in CTCF-mediated insulation at *Hox* Clusters**

Havva Ortabozkoyun-Kara<sup>1,2</sup>, Pin-Yao Huang<sup>1,2</sup>, Hyunwoo Cho<sup>3,4,5</sup>, Varun Narendra<sup>6</sup>, Gary Leroy<sup>1,2</sup>, Edgar Gonzalez-Buendia<sup>1,2</sup>, Jane A. Skok<sup>3</sup>, Aristotelis Tsirigos<sup>3,4,7</sup>, Esteban O. Mazzoni<sup>8</sup> and Danny Reinberg<sup>1,2,\*</sup>

Correspondence to: [Danny.Reinberg@nyulangone.org](mailto:Danny.Reinberg@nyulangone.org)

34 **Supplementary Notes**

35 **Supplementary Note 1**

36 The reduction in *Hoxa5-P2A-mCherry* upon de-repression of *Hoxa7-P2A-EGFP* observed in  
37 **Extended Data Figure 1c,d** is likely due to the phenomenon of posterior prevalence of *Hox* gene  
38 expression<sup>1,2</sup>.

39 **Supplementary Note 2**

40 Throughout the screen, *Hox* gene reporter expression was not observed in ESCs upon perturbation  
41 of any gene, which increased our confidence in identifying CTCF-boundary related candidates  
42 rather than general repressors. Notably, the CRISPR loss-of-function screen setup in this  
43 differentiation system mainly allows for the identification of non-essential genes involved in  
44 CTCF-boundary function at the *HoxA* cluster due to depletion of essential genes/differentiation-  
45 related genes at earlier time-points.

46 **Supplementary Note 3**

47 Affinity purification was performed to enrich for CTCF-bound chromatin fragments using FLAG  
48 pull-down followed by FLAG peptide elution to minimize nonspecific interactions. Mass  
49 spectrometry (MS) was performed on eluted proteins. In the case of both ESCs and MNs, wild-  
50 type cells without the FLAG-tag served as background controls to normalize FLAG IPs.

51 **Supplementary Note 4**

52 This custom library included sgRNAs targeting the list of candidates from the primary screens,  
53 and other proteins that co-purified with CTCF (**Extended Data Fig. 2h**). Therefore, all candidates  
54 regardless of their essentiality were re-evaluated through these independent secondary screens.

55 The sgRNAs in the custom library were retrieved from another genome-wide library constructed  
56 with improved design tools<sup>3</sup>.

57 The identification of several essential genes (*i.e. Ctf*, cohesin components...*etc.*) in secondary  
58 CRISPR loss-of-function screens is likely due to heterozygous perturbation of these genes and the  
59 increased power of secondary screens with a smaller library.

#### 60 **Supplementary Note 5**

61 Although MAZ and CTCF co-localize on the cross-linked chromatin (**Fig. 1g**, and **Fig. 2j-l**), they  
62 did not co-immunoprecipitate (co-IP) under native conditions (**Extended Data Fig. 2e-g**).

#### 63 **Supplementary Note 6**

64 We reasoned that if MAZ binding close to a CTCF boundary has a direct effect on anterior-  
65 posterior patterning, deletion of its binding motif could alter *Hox* gene expression similar to MAZ  
66 KO in MNs. Importantly, the evidence generated by individual motif deletions of MAZ at *Hox*  
67 clusters eliminates the possibility that the MAZ KO phenotype on *Hox* was attributable to the  
68 dysfunction of other developmental genes or pathways (**Extended Data Fig. 4a-b**, also see **Fig.**  
69 **2g** and **Fig. 3d**).

#### 70 **Supplementary Note 7**

71 As expected, the active (A) and inactive (B) compartments were not affected upon MAZ KO in  
72 ESCs and MNs (**Extended Data Fig. 8b**). There were also changes in boundary scores upon MAZ  
73 KO in ESCs and MNs as shown by PCA (**Extended Data Fig. 8c**). Moreover, we observed that  
74 some loop domains in larger ranges are also slightly downregulated upon MAZ KO while we did  
75 not observe local effects of MAZ KO on *Hox* cluster organization with respect to the CTCF and  
76 MAZ boundary, within the resolution of HiC (**Supplementary Fig. 3 to 5**).

77 **Supplementary Note 8**

78 In previous studies, a subset of cohesin binding sites was described to co-localize with NIPBL, the  
79 cohesin loader protein, and mediator complex in mouse ESCs<sup>4</sup>. Indeed, 50% of the NIPBL binding  
80 sites contain the motif for SP1<sup>5</sup>, another zinc finger protein binding to a GC-rich DNA motif  
81 ‘GGGCGG’ similar to MAZ<sup>6</sup>. In addition, transcription has been shown to re-locate cohesin to  
82 active promoters in the absence of CTCF<sup>7</sup>.

83 **Supplementary Note 9**

84 In particular, MAZ appears to be present at the loop anchors with or without CTCF (**Fig. 4d**),  
85 possibly contributing to CTCF stability (**Extended Data Fig. 5f-i**), and both proteins interact with  
86 cohesin components independently (**Fig. 5a** and **Extended Data Fig. 2f-g**). These observations  
87 are consistent with a recent study showing changes to the global architecture upon MAZ  
88 knockdown in K562 cells<sup>8</sup>, yet our work reveals the contribution of MAZ to the organization of  
89 the architectural genome during differentiation via KO studies.

90 Given that MAZ-containing loop anchors were detected based on HiC (**Fig. 4d** and **Extended**  
91 **Data Fig. 8g**), that MAZ and RAD21 interact (**Fig. 5a**), and that RAD21 re-localized to MAZ  
92 binding sites upon CTCF depletion (**Fig. 5c**), MAZ may function in concert with cohesin, either  
93 together with or independently of CTCF, which requires further testing (see **Fig. 7**). Interestingly,  
94 many short-range chromosomal contacts, including ones connecting active promoters with each  
95 other and with active enhancers are not affected by CTCF and cohesin depletion, suggesting the  
96 existence of alternative enhancer-promoter pairing mechanisms independent of these proteins<sup>9</sup>.  
97 We speculate that the contacts remaining after depleting the major architectural proteins such as  
98 CTCF and cohesin could correlate with MAZ and possibly other factors yet to be determined.

99 **Supplementary Note 10**

100 Although more than 25 out of 39 *Hox* genes are expressed in the kidney, the role of *Hox* genes  
101 other than the *Hox11* paralogous group seems to be under active investigation<sup>10</sup>. In addition, *HoxD*  
102 gene expression can be regulated through a putative mesenchyme enhancer (*Hoxd9* to *Hoxd12*)  
103 and ureteric bud enhancer (*Hoxd1* to *Hoxd9*) in kidney development<sup>11</sup>. Hence, it can be informative  
104 to study possible *Hox* gene misexpression patterns in the kidney or urinary track in *Maz*<sup>-/-</sup> mice.

105 **Supplementary Note 11**

106 Although gene expression changes have been correlated with alterations in topological  
107 organization upon loss of MAZ (**Fig. 4c**, **Extended Data Fig. 8f** and **Extended Data Fig. 9**), we  
108 emphasize that the effect will vary for different enhancer-promoter pairs, and as a function of other  
109 regulatory elements within their domain, including insulators (*i.e.* CTCF), partially redundant  
110 enhancers, and structural loop anchors<sup>12</sup>. We propose that both CTCF- and MAZ-mediated  
111 boundary activity are regulated in a cell-type specific manner in relation to the local chromatin  
112 environment. In ESCs, the insulation capacity of CTCF- and/or MAZ-containing loops is  
113 overridden by self-assembling Polycomb domains. As observed during differentiation, *Hox*  
114 clusters form active and repressed chromatin domains, allowing CTCF- and/or MAZ-mediated  
115 alteration of regulatory contacts.

116

117

118

119

## Supplementary Figures

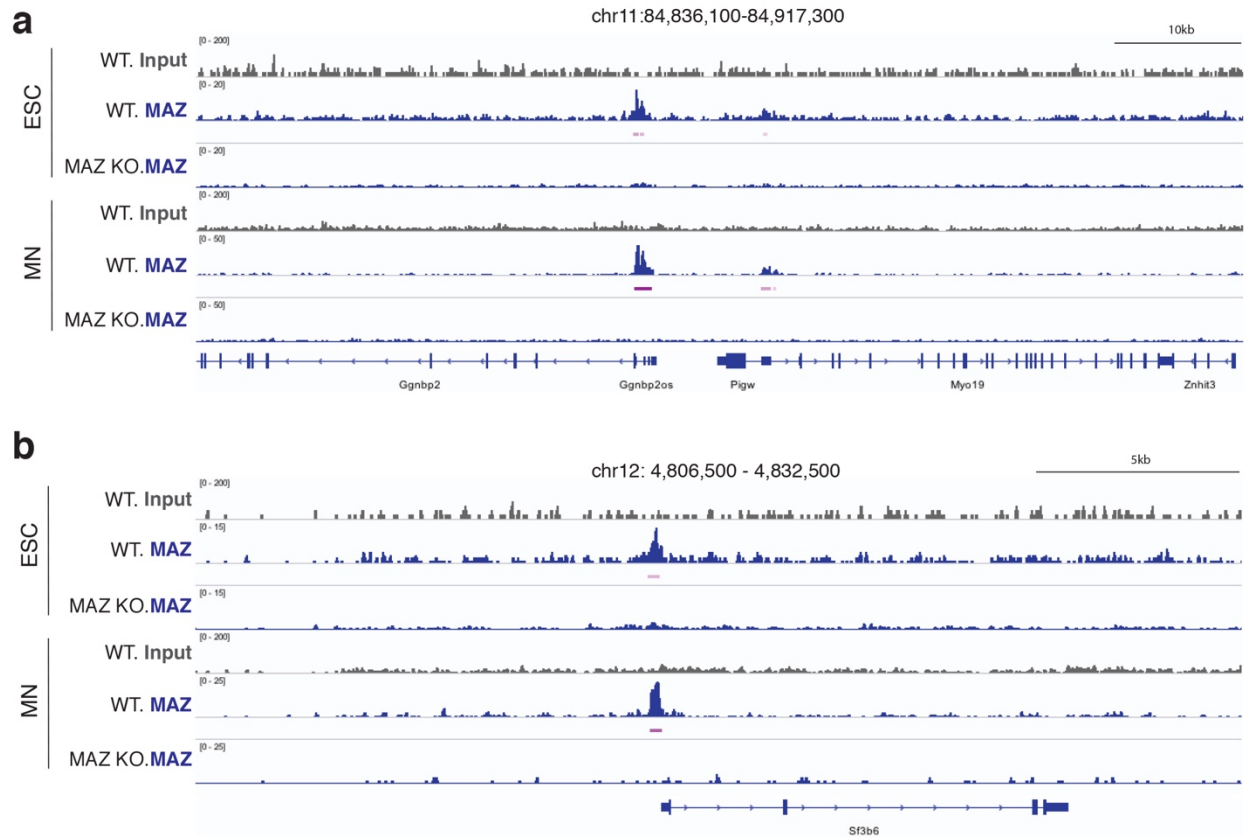

121

122 **Supplementary Fig. 1 | MAZ ChIPseq in ESCs and MNs. a**, MAZ ChIPseq peaks at *Ggnbp2os*  
 123 gene locus and *Sf3b6* gene locus (**b**). Purple is narrow peak files called by MACS2.

124

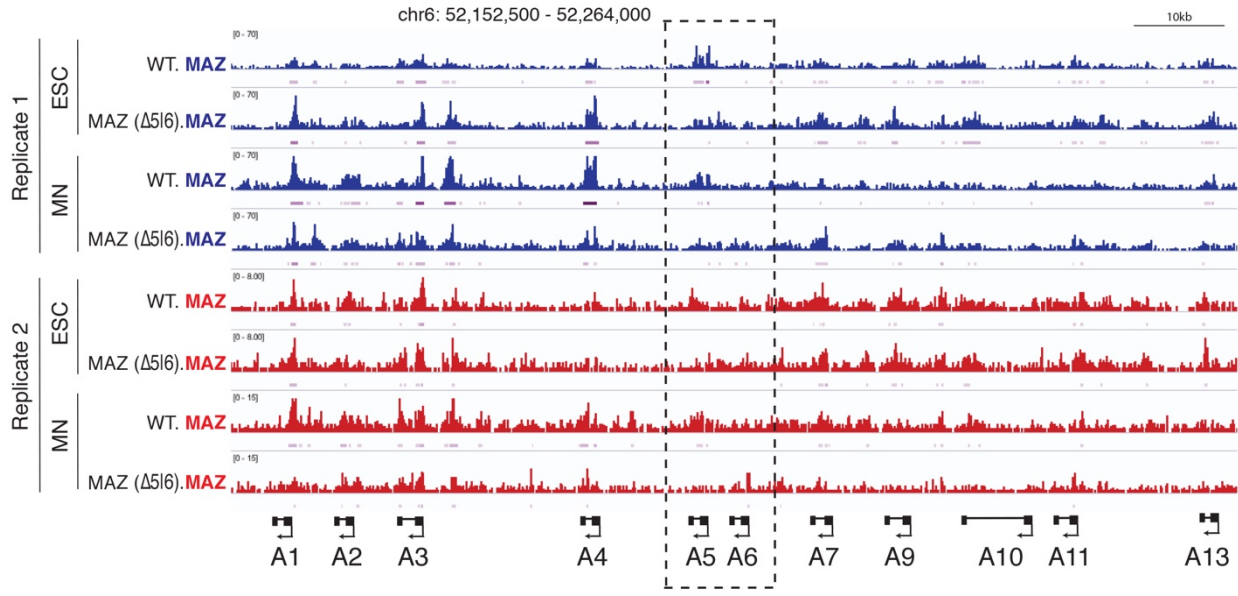

125

126 **Supplementary Fig. 2 | Reduced MAZ ChIPseq signal at *Hoxa5|6* region upon MAZ motif**  
 127 **deletion.** MAZ ChIPseq signal in *HoxA* cluster in WT versus MAZ motif deletion in ESCs and  
 128 MNs. Two biological replicates are indicated with blue and red colors. The peaks called by  
 129 MACS2 are indicated under the ChIPseq tracks in purple.

130



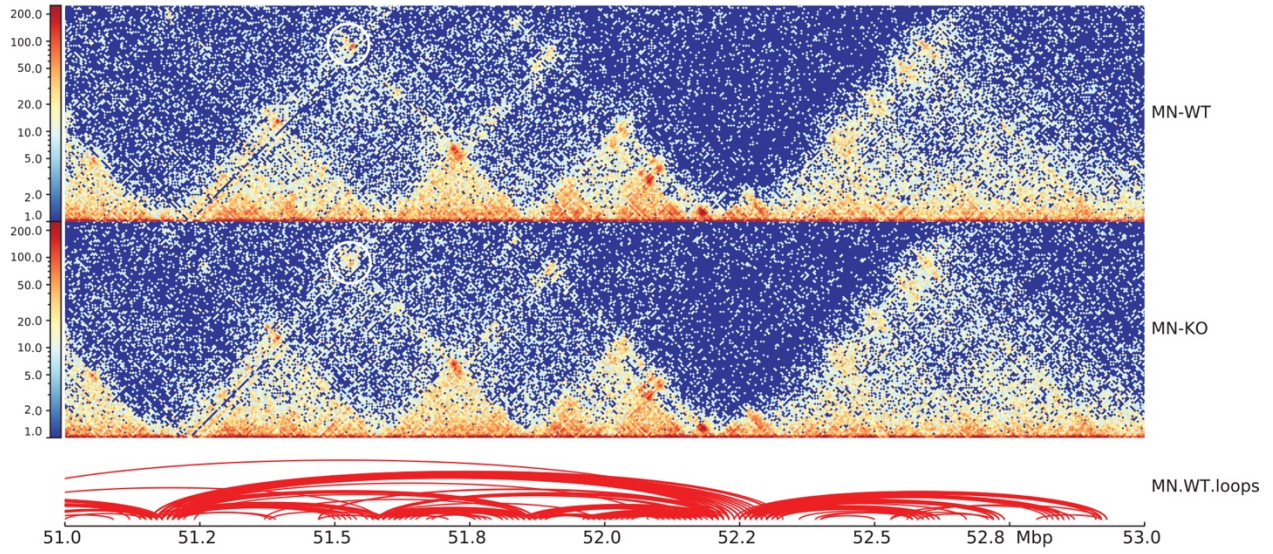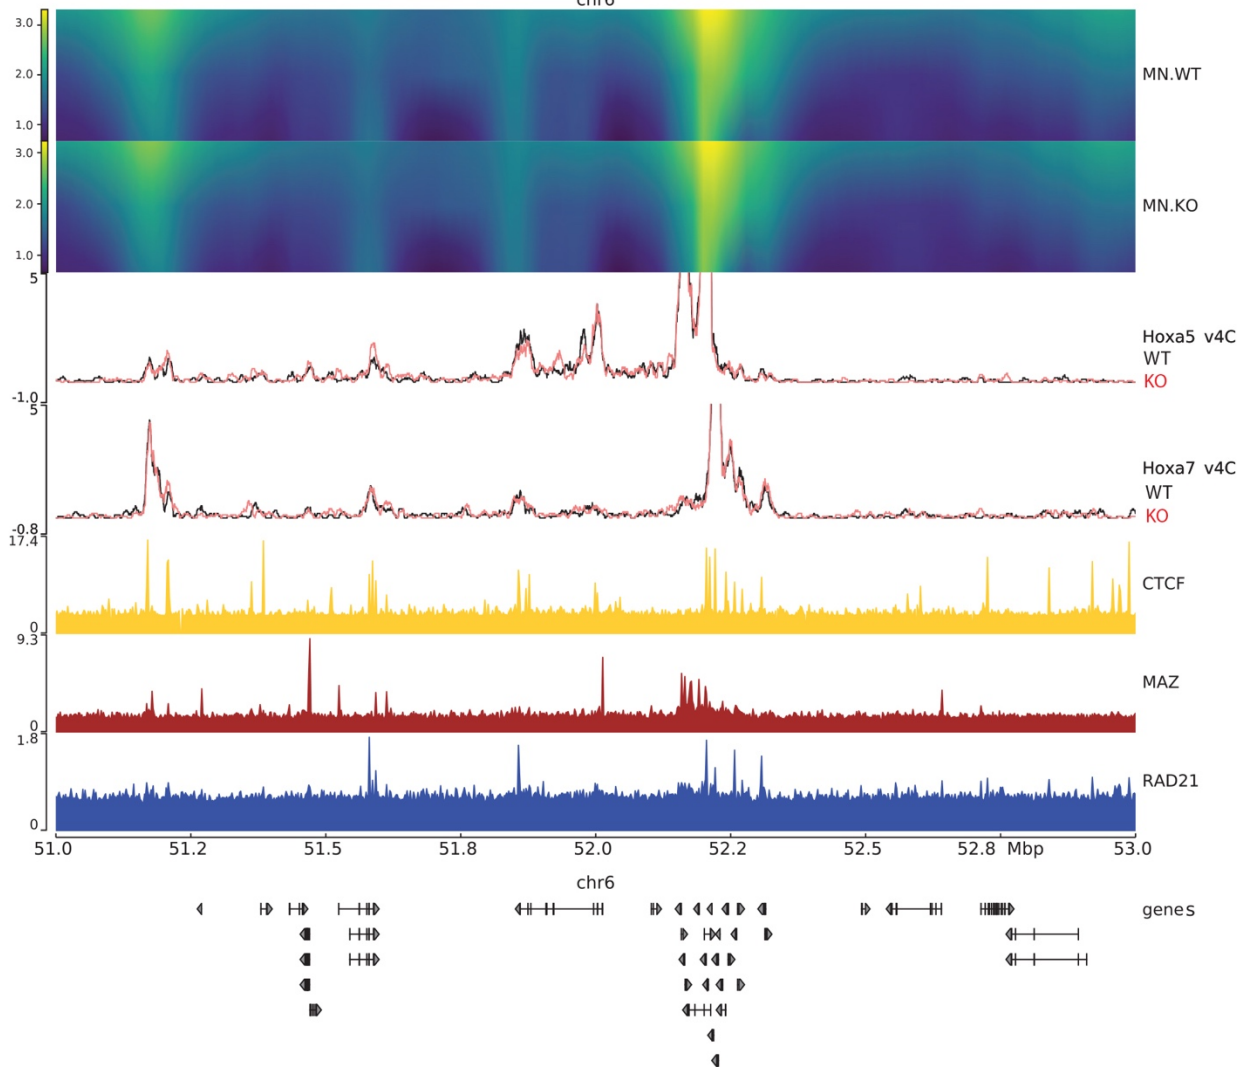

132 **Supplementary Fig. 3 | Visualization of HiC analysis at the indicated region in WT and MAZ**  
133 **KO MNs.** Visualization of Hi-C contact matrices for a zoomed-in region on chromosome 6 with  
134 a change of loop activity in WT vs MAZ KO MNs. Shown below are insulation score heat maps  
135 in WT MNs and MAZ KO MNs, virtual 4C plots with *Hoxa5* as viewpoint and *Hoxa7* as  
136 viewpoint, and CHIP-seq read densities for CTCF, MAZ, and RAD21. The last track shows gene  
137 annotations.

138

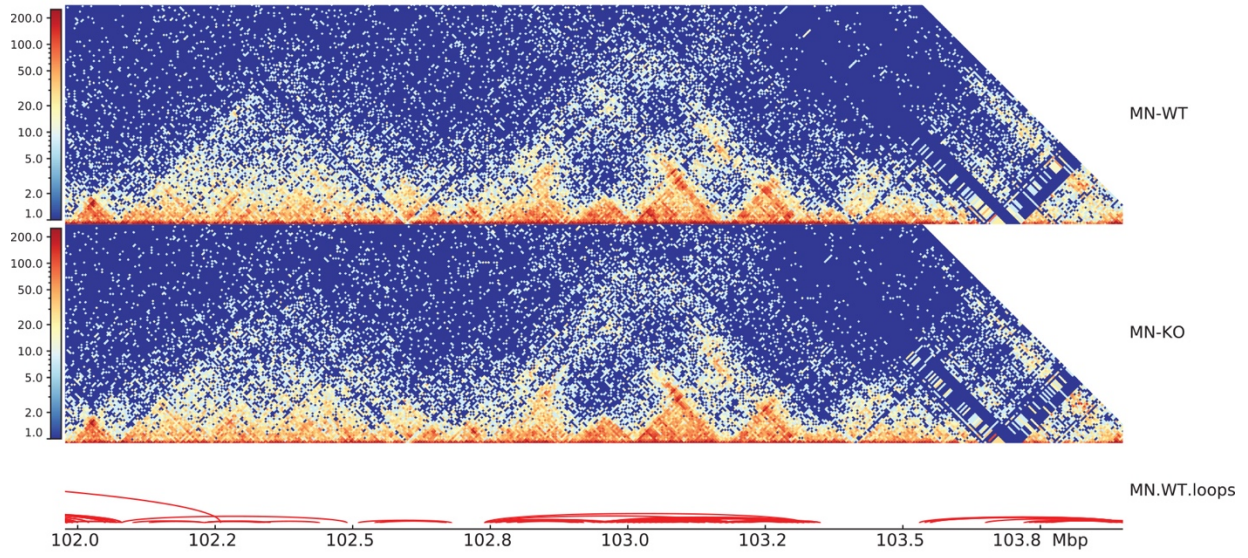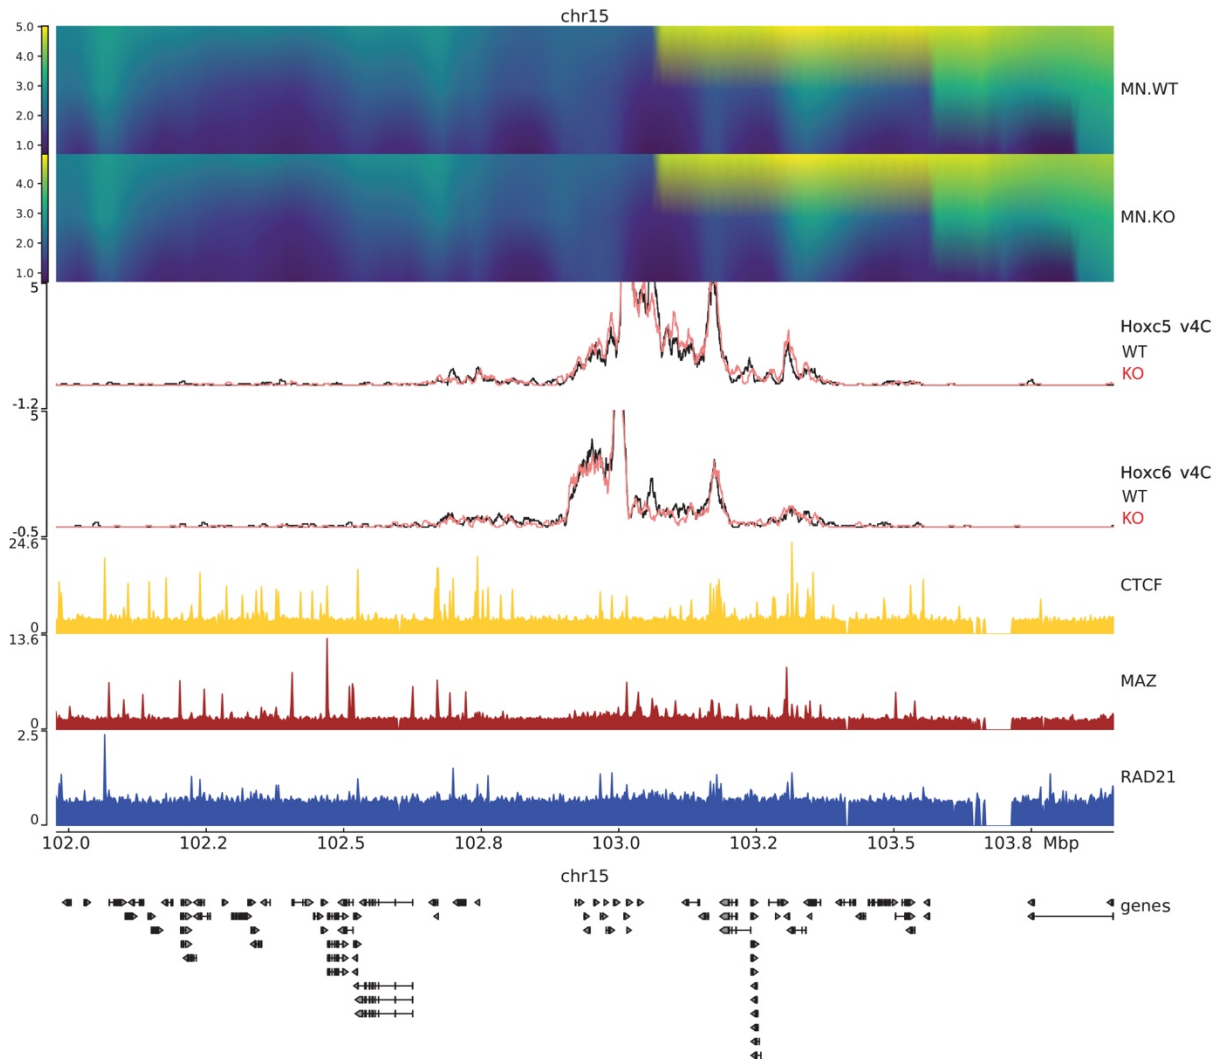

140 **Supplementary Fig. 4 | Visualization of HiC analysis at indicated regions in WT and MAZ**  
141 **KO MNs.** Visualization of Hi-C contact matrices for a zoomed-in region on chromosome 15 in  
142 WT vs MAZ KO MNs. Shown below are insulation score heat maps in WT MNs and MAZ KO  
143 MNs, virtual 4C plots with *Hoxc5* as viewpoint and *Hoxc6* as viewpoint, and ChIP-seq read  
144 densities for CTCF, MAZ, and RAD21. The last track shows gene annotations.

145

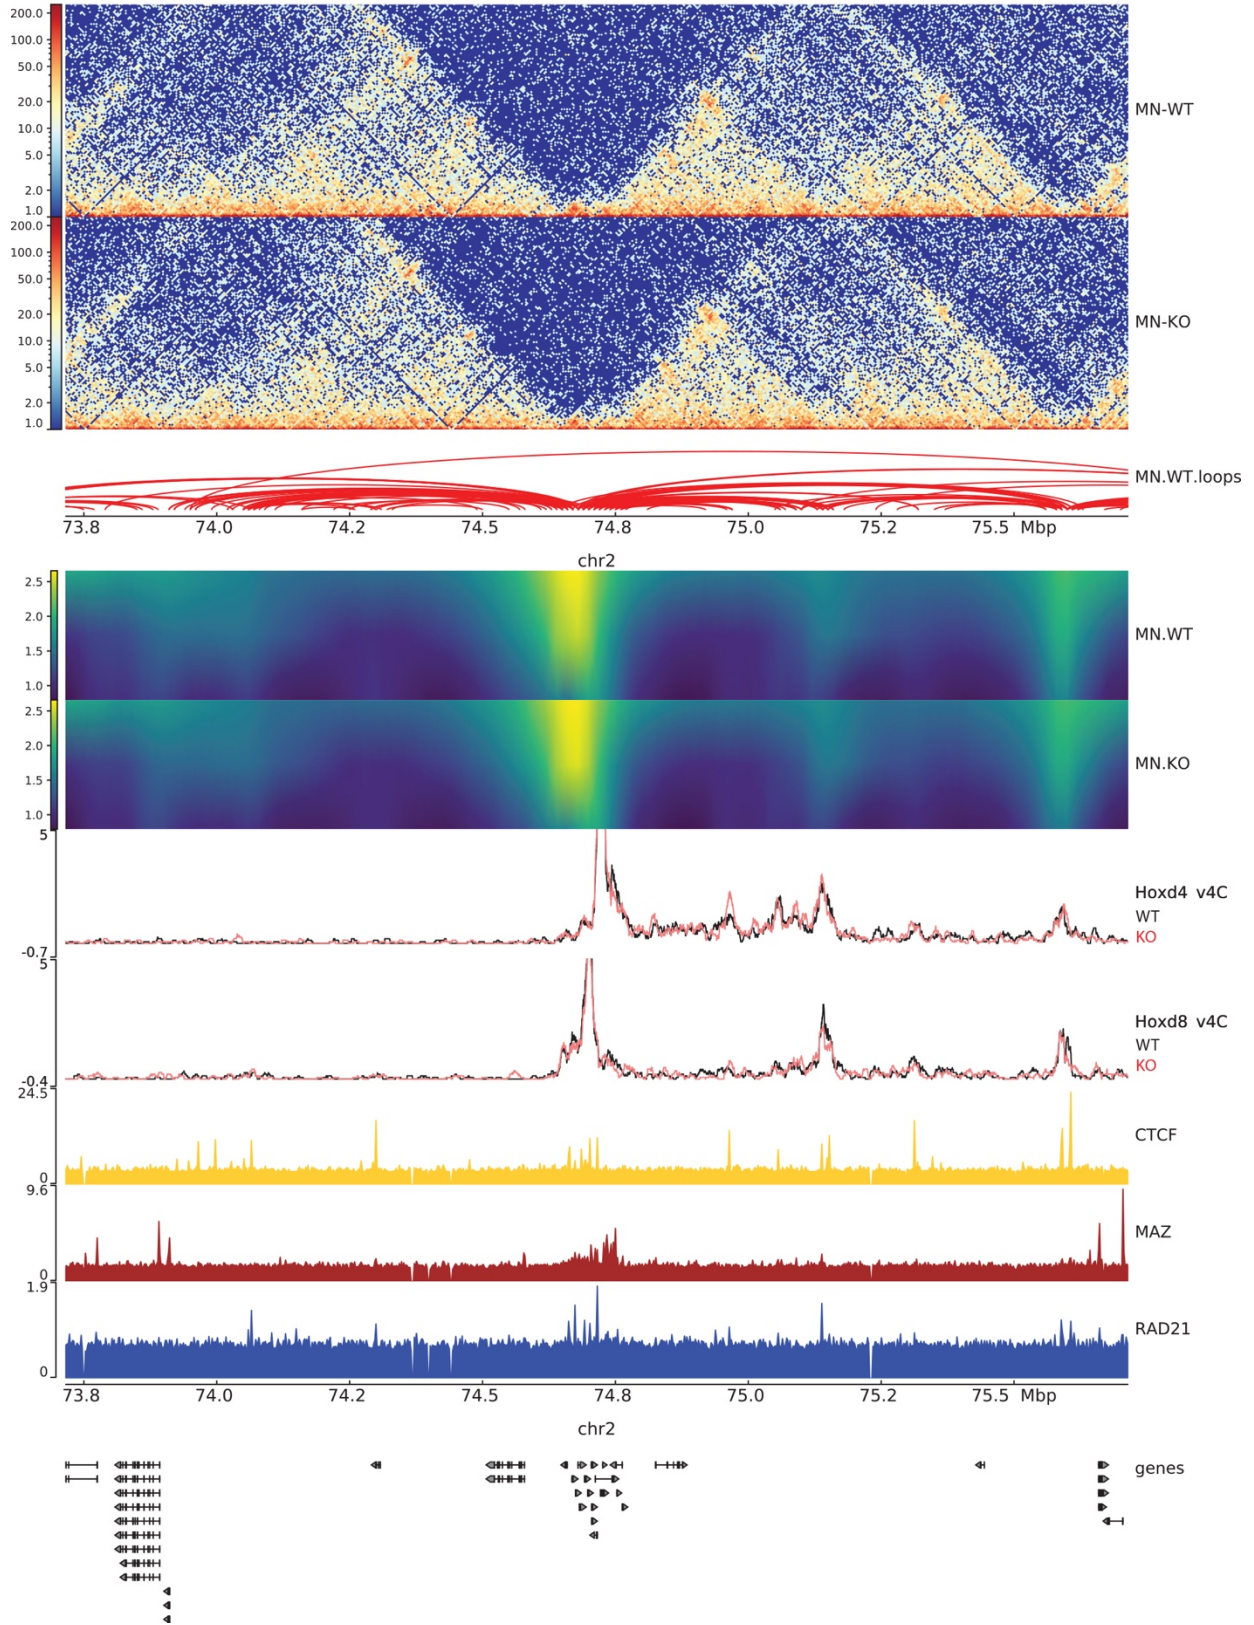

147 **Supplementary Fig. 5 | Visualization of HiC analysis at indicated regions in WT and MAZ**  
148 **KO MNs.** Visualization of Hi-C contact matrices for a zoomed-in region on chromosome 2 in WT  
149 vs MAZ KO MNs. Shown below are insulation score heat maps in WT MNs and MAZ KO MNs,  
150 virtual 4C plots with *Hoxd4* as viewpoint and *Hoxd8* as viewpoint, and ChIP-seq read densities for  
151 CTCF, MAZ, and RAD21. The last track shows gene annotations.

152

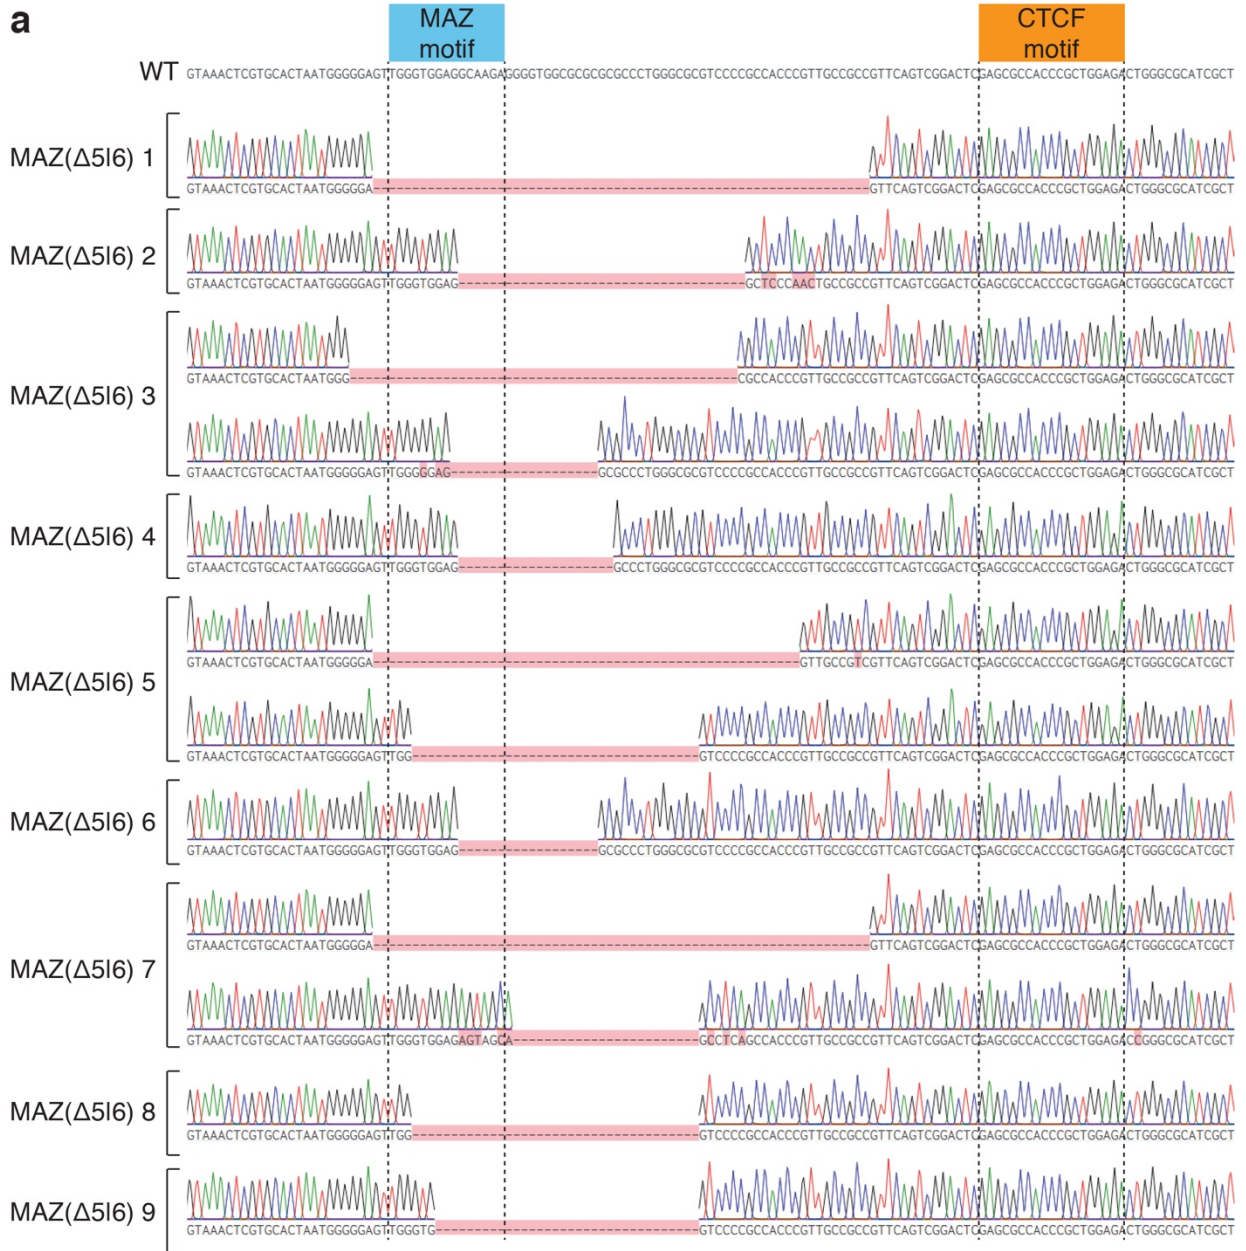

**b**

| MAZ( $\Delta$ 516) MICE | GENOTYPE                                        | MAZ motif                         | CTCF motif |
|-------------------------|-------------------------------------------------|-----------------------------------|------------|
| 1                       | 64 bp deletion                                  | all motif deletion                | intact     |
| 2                       | 37 bp deletion                                  | 6 bp deletion                     | intact     |
| 3                       | 50 bp deletion / 19 bp deletion & 3 bp mutation | all motif deletion/7bp deletion   | intact     |
| 4                       | 20 bp deletion                                  | 6 bp deletion                     | intact     |
| 5                       | 37 bp deletion / 55 bp deletion                 | all motif deletion/12 bp deletion | intact     |
| 6                       | 18 bp deletion                                  | 6 bp deletion                     | intact     |
| 7                       | 64 bp deletion / 24 bp deletion                 | all motif deletion/4bp mutation   | intact     |
| 8                       | 37 bp deletion                                  | 12 bp deletion                    | intact     |
| 9                       | 34 bp deletion                                  | 9 bp deletion                     | intact     |

154 **Supplementary Fig. 6 | CRISPR-based zygotic injection results in deletions of a *HOXA* MAZ**  
155 **motif *in vivo*. a,** CRISPR based deletions in 9 mice upon targeting of the MAZ motif region at  
156 *HoxA* cluster. MAZ motif and CTCF motifs are indicated. **b,** Table summarizing the length of  
157 CRISPR deletions in mice with respect to MAZ and CTCF motifs.

158



**a**

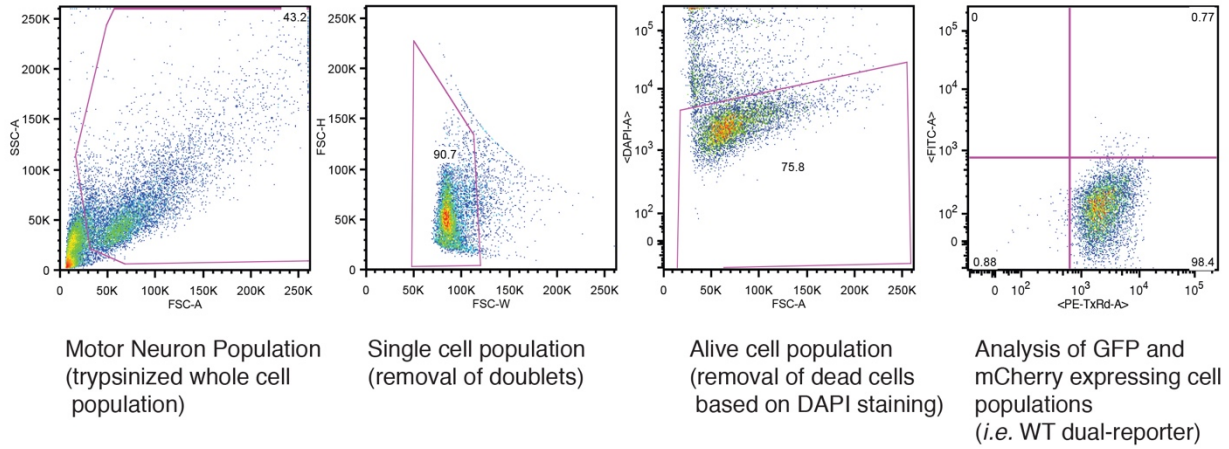

**b**

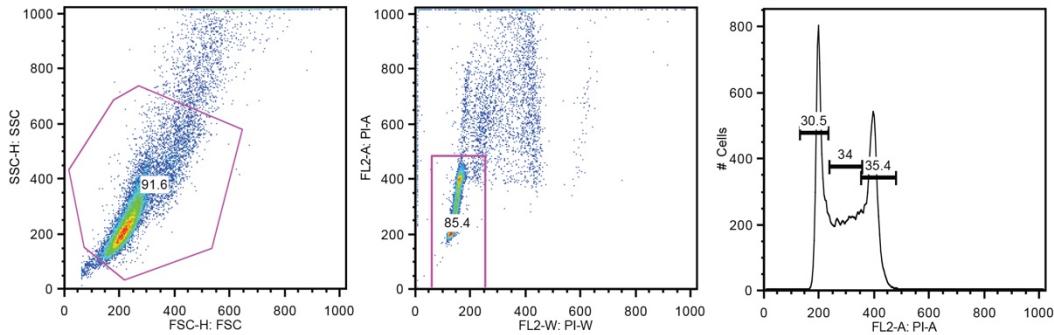

ESC Population (trypsinized whole cell population)

Single cell population (removal of doublets)

Cell cycle profiles

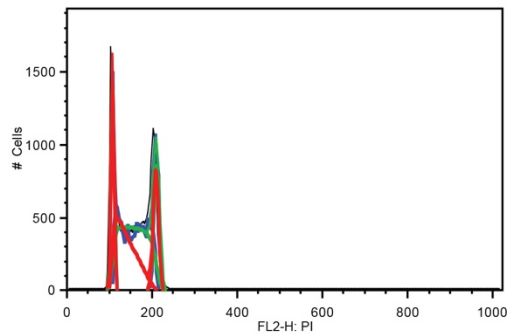

Watson Pragmatic: %G1 = 18.1; %S = 60.7; %G2 = 20.3.  
Dean/Jett/Fox: %G1 = 18.7; %S = 59.4; %G2 = 21.4.  
Two pops (one div): %G1 = 16.8; %S = 39.9; %G2 = 18.7.  
Cell Cycle

Analysis of cell populations at different stages of cell cycle

159

160 **Supplementary Fig. 7 | FACS analysis scheme indicating gating of cellular populations. a,**

161 Analysis dual *Hox* reporter in MNs. **b,** Analysis of cell cycle in ESCs.

162

TABLE S1

CRISPR sgRNAs, DONORS, GENOTYPING PRIMERS

| sgRNA oligos    |                          |                           |                                     |                                    |
|-----------------|--------------------------|---------------------------|-------------------------------------|------------------------------------|
| Primer Name     | Forward Sequence         | Reverse Sequence          | sgRNA target                        | Aim                                |
| A5.Cterm.gRNA   | CACCGTTTGGCCGCTCAGATGCTC | AAACGAGCATCTGAGCGGCCAAAC  | <i>Hoxa5</i>                        | <i>Hoxa5</i> -P2A-mCherry knock-in |
| A7.Cterm.gRNA   | CACCGGCTGACAAGGGCGACGAGG | AAACCTCTGTCGCCTTGTGAGCC   | <i>Hoxa7</i>                        | <i>Hoxa7</i> -P2A-eGFP knock-in    |
| HOX5/6.gRNA.3   | CACCGGACTGCTGAGCCACCCGCG | AAACGCGGGTGGCGCTCAGAGTCCC | CTCF binding site at <i>Hoxa5/6</i> | CTCF binding site deletion         |
| Hox6/7.gRNA.new | CACCGGCTCGTGTGCCACGCTG   | AAACGAGCTGGCAGCAGCGAGCC   | CTCF binding site at <i>Hoxa6/7</i> | CTCF binding site deletion         |
| CTCF.Cterm.gRNA | CACCGCATGATGGACCGGTGATGC | AAACGCATCACCGGTCCATCATGC  | <i>Ctcf</i>                         | CTCF C-terminus FLAG tag knock-in  |
| Maz.ex2.2       | CACCGCGAATGCGACAGCTTATGT | AAACACATAAGCTTCCGATTCGGC  | <i>Maz</i>                          | MAZ knock-out                      |
| Maz.a56.gRNA1   | CACCGGAGTTGGGTGGAGGCAAGA | AAACTCTTGCCTCCACCAACTCC   | MAZ binding site at <i>Hoxa5/6</i>  | MAZ binding site deletion          |
| Maz.d48.gRNA2** | CACCGGATGCCGCCATGTCCTGGG | AAACCCAGGGCATGGGCGGCATCC  | MAZ binding site at <i>Hoxd4/8</i>  | MAZ binding site deletion          |
| Maz.d48.gRNA3** | CACCGCGAGCTGAGGTGGAAGGCG | AAACCGCTTCCACCTCAGCTCGCC  | MAZ binding site at <i>Hoxd4/8</i>  | MAZ binding site deletion          |

\*\*simultaneously transfected \*G for U6 promoter transcription initiation \*BbsI overhang

163

Genotyping Primers

| Experiment                                    | Primer Name                        | Forward Sequence         | Reverse Sequence       |
|-----------------------------------------------|------------------------------------|--------------------------|------------------------|
| <i>Hoxa5.a7</i> dual reporter genotyping      | A5.AH1.int.F/A5.AH2.int.R          | GACAATATAGGTGGCCAGAAG    | GATGAATTAGGGCAACGAGAAC |
| <i>Hoxa5.a7</i> dual reporter genotyping      | A7.AH1.int.F/A7.AH2.int.R          | TCCACATCTAGTCTGCTGTGIC   | TCTTAAAGACGCTTTTCCAAGT |
| <i>Hoxa5.a7</i> dual reporter genotyping      | A5.AH1.int.F/mCherry.begin.R       | GACAATATAGGTGGCCAGAAG    | GTACATGAACTGAGGGGACAGG |
| <i>Hoxa5.a7</i> dual reporter genotyping      | A7.AH1.int.F/EGFP.begin.R          | TCCACATCTAGTCTGCTGTGIC   | GCAGATGAACTCAGGGTTCAG  |
| <i>Hoxa5.a7</i> dual reporter genotyping      | mCherry.end.F/A5.out.R             | CAACATCAAGTTGGACATCACC   | CTCAATTCAGTCTTGCCAAATG |
| <i>Hoxa5.a7</i> dual reporter genotyping      | EGFP.end.F/A7.out.R                | ACATGGTCTGCTGGAGTTC      | CCAGAGGACGAGGAAATAG    |
| <i>Hoxa5.a7</i> dual reporter genotyping      | A5.out.F/P2A.R                     | TGGTACATCTTAATGGAATGTC   | TCAGCAGAGAGAAGTTTGTGTC |
| <i>Hoxa5.a7</i> dual reporter genotyping      | A7.out.F/P2A.R                     | AATGGGTTTGGTGTAAATCTG    | TCAGCAGAGAGAAGTTTGTGTC |
| <i>Hoxa5.a7</i> dual reporter genotyping      | A5.out.F/mCherry.begin.R           | TGGTACATCTTAATGGAATGTC   | GTACATGAACTCAGGGGACAGG |
| <i>Hoxa5.a7</i> dual reporter genotyping      | A7.out.F/EGFP.begin.R              | AATGGGTTTGGTGTAAATCTG    | GCAGATGAACTCAGGGTTCAG  |
| <i>Hoxa5.a7</i> dual reporter genotyping      | pBluescript.out.F1/mCherry.begin.R | CAAGGCGATTAAGTTGGGTAAC   | GTACATGAACTGAGGGGACAGG |
| <i>Hoxa5.a7</i> dual reporter genotyping      | pBluescript.out.F1/EGFP.begin.R    | CAAGGCGATTAAGTTGGGTAAC   | GCAGATGAACTCAGGGTTCAG  |
| FLAG-CTCF knock-in cell line genotyping       | CTCF.Ctag.F1/R1                    | AAAAAGGAGCCAGATGCCGA     | GCCGTTTAAACACAGCCCAA   |
| CTCF binding site deletion ( <i>Hoxa5/6</i> ) | 5/6.494.new2.F/r                   | CACCCCTGCAACAATTTATGATGA | GGATACAAAGCCGGGAAAATAA |
| CTCF binding site deletion ( <i>Hoxa6/7</i> ) | HOX6/7.PCR.530.F/r                 | TGTACAACACAGTCTCCATGGTG  | GTTCCCTGGCTATGGTCTTTTT |
| MAZ knock-out                                 | Maz.ex2.g2.F1/R1                   | AAGCGCATCCGGAAGAATCA     | CAGTGGGAGCAGTTGTAGGG   |
| MAZ knock-out                                 | Maz.ex2.g2.F2/R2                   | TCGGGTGCTATGAAGATGCC     | CAGTGGGAGCAGTTGTAGGG   |
| MAZ binding site deletion ( <i>Hoxa5/6</i> )  | Maz.a56.geno.F1/R1                 | TGACTGGGACATGACTCGG      | TGGGCTGTAACCTCAATTCCGA |
| MAZ binding site deletion ( <i>Hoxa5/6</i> )  | Maz.a56.geno.F2/R2                 | TCGGTTCCTCTACGTAGG       | GCTCGAGTCCGACTGAACG    |
| MAZ binding site deletion ( <i>Hoxd4/8</i> )  | Maz.d48.geno.F1/R1                 | TTTCGGTGTGTGGAGCTTT      | CGGACAAGTGATCACACCAC   |
| MAZ binding site deletion ( <i>Hoxd4/8</i> )  | Maz.d48.geno.F2/R2                 | GGACTCTTTTTGCCTCTCC      | CGGACAAGTGATCACACCAC   |

164  
165

Oligos/Donor Plasmid

|                                                                                           |                                                                                                                                                                                                                                                                                                                                                                                                                                                                                                                                                                                                                                                                                                                                                                 |
|-------------------------------------------------------------------------------------------|-----------------------------------------------------------------------------------------------------------------------------------------------------------------------------------------------------------------------------------------------------------------------------------------------------------------------------------------------------------------------------------------------------------------------------------------------------------------------------------------------------------------------------------------------------------------------------------------------------------------------------------------------------------------------------------------------------------------------------------------------------------------|
| <b><i>Hoxa5</i>-P2A-mCherry knock-in (pBlueScript SK+ containing AH1-P2A-mCherry-AH2)</b> |                                                                                                                                                                                                                                                                                                                                                                                                                                                                                                                                                                                                                                                                                                                                                                 |
| A5 arm of homology 1 (AH1)                                                                | 2004 bp                                                                                                                                                                                                                                                                                                                                                                                                                                                                                                                                                                                                                                                                                                                                                         |
| <i>P2A.mCherry.cassette</i>                                                               | GGATCCGGCGCAACAACTTCTCTGCTGAAACAAGCCGGAGATGTGCAAGAGAATCCCGTCTGTGAGCAAGGGCAGGAGGATAACATGCGCCATCATCAAGGAGTTCATGGCTTCAAGGTGACATGAGGGGTCCTGTAACGGCCACGAGTTCGAGATCGAGGCGAGGGCGAGGGCCGCCCTACGAGGGCACCCAGCCGCAAGCTGAAGGTGACCAAGGGTGGCCCTGCCCCTTCGCTGGGACATCTGTCCTCAAGTTCATGTACCTGCAAGGCTACGTGAAGCACCACCCCGGCATCCCGACTCTTGAAGCTGTCTTCCCGGAGGGCTTCAAGTGGGAGCGGTGATGAACTTCGAGGACGGCGGGTGGTGACCGTGACCCAGGACTCCCTCCCTGCAAGGACGGCGAGTTCATCTACAAGTGAAGCTGCGCGGCAACTTCCTCCGACGGCCCGTAATGCAAGAAGAAGCATTGGGCTGGGAGGCTCTCCGAGCGGATGTACCCGAGGACGGCCCTGAAGGGCGAGATCAAGCAGAGGCTGAAGTGAAGGACGGCGCCACTACGACGCTGAGGTCAAGACCCTACAAGGCCAAGAGCCCGTGCAGTGCCTCCGCCCTACAACGTCAACATCAAGTTGGACATCACTCCCAACAGGAGACTACACCATCTGTGAACAGTACGAACCGCCGAGGGCCGCCACTCCACCGGCGCATGGACGAGCTGTACAAGGAATCTAA |
| A5 arm of homology 2 (AH2)                                                                | 2225 bp                                                                                                                                                                                                                                                                                                                                                                                                                                                                                                                                                                                                                                                                                                                                                         |
| <b><i>Hoxa7</i>-P2A-eGFP knock-in (pBlueScript SK+ containing AH1-P2A-eGFP-AH2)</b>       |                                                                                                                                                                                                                                                                                                                                                                                                                                                                                                                                                                                                                                                                                                                                                                 |
| A7 arm of homology 1 (AH1)                                                                | 1698 bp                                                                                                                                                                                                                                                                                                                                                                                                                                                                                                                                                                                                                                                                                                                                                         |
| <i>P2A.eGFP.cassette</i>                                                                  | GGATCCGGCGCAACAACTTCTCTGCTGAAACAAGCCGGAGATGTGCAAGAGAATCCCGTCTGTGAGCAAGGGCAGGAGGCTGTTCCAGGGTGGTGCCTCTGGTGCAGCTGGACGGCGACGTTAAACGGCCACAAGTTCAGCGTGTCCGGCAGGGCGAGGGCGATGCCACCTACGGCAAGCTGACCTGAAAGTTCATCTGCAACCCGGCAAGCTGCCCTGGCCACCTCGTGACCACCTGACCTACGGCGTGCAGTGTTCAGCGCTACCCGACCATGAAGCAGCAGCACTTCTCAAGTCCGCCATGCCGAAGGCTACGTCCAGGAGCGCAACTCTTCAAGGACGCGGCAACTACAAGCAGCCGCGGAGGTGAAGTTCGAGGGGACACCTGTGTGAACCCATCAGAGTGAAGGGCATGCACTTCAAGGAGACCGCAACATCTGGGGACAAGCTGGAGTACAACAACAGCCACAAGTCTATATCATGGCCACAAGCAGAAGAAGCCGATCAAGTGAAGTTCAGATCCGCCACAACATCGAGGACGGCGAGCTGACGCTCCGCACTACAGCAGAAACACCCCACTCCGGCAGGCGGCTGCTGCTGCCGACAACCACTACCTGAGCACCCAGTCCGCCCTGAGCAAAAGCCCAACGAGAAGCGCATACATGTTCTGTGGAGTTCGTGACCGCCGCCGGATCACTCTCGGCATGGACGAGCTGTACAAGGAATCTAA      |
| A7 arm of homology 2 (AH2)                                                                | 2323 bp                                                                                                                                                                                                                                                                                                                                                                                                                                                                                                                                                                                                                                                                                                                                                         |
| <b>CTCF C-terminus FLAG tag knock-in (ssDNA oligo)</b>                                    |                                                                                                                                                                                                                                                                                                                                                                                                                                                                                                                                                                                                                                                                                                                                                                 |
| CTCF.Ctag.oligo                                                                           | GCTCAGGACGCCACACAGACGCCCCCAACGGAGACTCACGCTGAGATGATCCTCAGCATGATGGACCGGGATCCGCTGACTACAAGGATGACGACGATAAGTGTGCTGGGGCTTGTCTGGCACCAGGACTATTGGGCTGTGTTAAACGGCCCAATCTTAATTTTTCTTTTTTCTTTTGTGCTTTGGGAAC                                                                                                                                                                                                                                                                                                                                                                                                                                                                                                                                                                  |

166  
167

Table S1. List of CRISPR sgRNAs, donors, and genotyping primers

**TABLE S2**

**OLIGOS, ANTIBODIES**

| RT-qPCR Primers |                         |                         |
|-----------------|-------------------------|-------------------------|
| Primer Name     | Forward Sequence        | Reverse Sequence        |
| Hoxa1           | ACCAAGAAGCCTGTCGTCC     | TAGCCGTAICTCCAACITTC    |
| Hoxa2           | CCTGGATGAAGGAGAAGAAGG   | GTTGGTGTACGGGTCTCA      |
| Hoxa3           | TCAAGGCAGAACTAAGCAGA    | ATAGGTAGCGTTGAAGTGGAA   |
| Hoxa4           | TGTACCCCTGGATGAAGAAGAT  | AAGACTTGTGCCGGTATAG     |
| Hoxa5           | TGTACGTGGAGTGTCTCTGTC   | GTCACAGTTTCGTCACAGAGC   |
| Hoxa6           | ACCGACCGGAAGTACACAAG    | AGGTAGCGTTGAAGTGGAA     |
| Hoxa7           | GAAGCCAGITTCGCATCTAC    | CTTCTCCAGITTCAGCGTCT    |
| Hoxa9           | TCCTGACTGACTATGCTGTG    | ATCGCTTCTCCGAGTGGAG     |
| Hoxa10          | GAAGAAACGCTGCCCTTACAC   | TTTCACTGTCTGCCGTGAG     |
| Hoxa11          | CGAGAGTCTTCTCAGCGTCT    | TGGAGCCTTAGAGAAGTGGATT  |
| Hoxa13          | GCGGTGTCCATGTACTTGTG    | GCTGCCCTACGGCTACTTC     |
| Hoxd3           | CTACCCCTGGATGAAGAAGGTG  | TCAGACAGACACAGGGTGTGA   |
| Hoxd4           | CTACCCCTGGATGAAGAAGGTG  | TTCTAGGACTTGTCTGTTGGT   |
| Hoxd8           | GCTCGTCTCTTCTCAAAATGTT  | GCGACTGTAGGTTTGTCTTCCT  |
| Hoxd9           | CAGCAACTTGACCCAACAAC    | TGGTATTTGGTGTAGGGACAGC  |
| Hoxc4           | AGCAAGCAACCCATAGTCTACC  | GCGGTGTAAATGAAACITTTCTC |
| Hoxc5           | CACAGATTTACCCGTGGATGAC  | CTTCTCGAGTTCAGGGTCT     |
| Hoxc6           | TAGTCTGAGCAGGGCAGGA     | CGAGTTAGGTAGCGGTTGAAGT  |
| Hoxc8           | GTAATCTCCGCCAACACTAA    | CGTCTTCTGGTCAATAAGGAT   |
| Hoxc9           | GCAAGCACAAGAGGAGAAGG    | CGTCTGGTACTTGGTGTAGGG   |
| Gapdh           | CAAGCTCATTCTCTGGTATGAC  | CTCCTGTTATTATGGGGTCTG   |
| Pou5f1          | CACCTACATCGCCAATCAGC    | GGCAGAGGAAAGGATACAG     |
| Gfp             | AGCTGACCCCTGAAGTTCATCTG | GGACTTGAAGAAGTCTGTCTG   |
| 18SrRNA         | GTAACCCGTGAACCCCAAT     | CCATCCAATCGGTAGTAGCG    |
| Hb9             | GAACACCAGTCAAGCTCAACA   | CTCTCCGCTTCTCCTCACTG    |
| Lhx3            | CGTAGCCTCTAAATGCGAGA    | TGGCAAAGGTGCTGTCTCAC    |
| Isl1            | GTTGGAGAAAGTGGAAATGAC   | TAGAACAGACTTCATGCGCTTC  |

\* Primer designs of *HoxA* and *HoxC* clusters are from the previous study<sup>13</sup>.

| ChIP-qPCR Primers        |                       |                      |
|--------------------------|-----------------------|----------------------|
| Primer Name              | Forward Sequence      | Reverse Sequence     |
| Ch.Dm.Ubx.TSS (spike-in) | CTGAGACGGGCTAAAAGTCG  | AGCACAGAAAGCGAGGAAAC |
| Maz.Hoxd48.chip          | TTCTAGGGCTGGTGGTGTGTC | CACCCACCTTGTCTGATG   |
| Maz.chipqper.entrl       | CAAAGGTCCCCATACCCAC   | CTAGTCGGCCATCACTGCAA |

| Antibodies  |                              |                  |                                  |                                                                |
|-------------|------------------------------|------------------|----------------------------------|----------------------------------------------------------------|
| Antibody    | Company                      | Catalogue #      | Application                      | Dilutions                                                      |
| CTCF        | Millipore                    | 07-729           | ChIP, CUT&RUN, Western Blot (WB) | ChIP: 5ul/100ug chromatin, CUT&RUN: 2ug/200K cells, WB: 1:1000 |
| MAZ         | Abcam                        | ab85725          | ChIP, Western Blot (WB)          | ChIP: 8ug/100ug chromatin, WB: 1:1000                          |
| H3K27me3    | Cell Signalling              | 9733             | ChIP, CUT&RUN                    | ChIP: 5ug/50ug chromatin, CUT&RUN: 2ug/200K cells              |
| H3K4me3     | Abcam                        | ab8580           | ChIP, CUT&RUN                    | ChIP: 5ug/50ug chromatin, CUT&RUN: 2ug/200K cells              |
| RAD21       | Abcam                        | ab992            | ChIP, CUT&RUN                    | ChIP: 5ug/100ug chromatin, CUT&RUN: 2ug/200K cells             |
| RAD21       | Abcam                        | ab154769         | Western Blot (WB)                | WB: 1:1000                                                     |
| CAS9        | Millipore                    | MAC133-clone 7A9 | Western Blot (WB)                | WB: 1:1000                                                     |
| HB9         | Developmental Hybridoma Bank | N/A              | Western Blot (WB)                | WB: 1:150                                                      |
| GAPDH       | Cell Signalling              | D16H11-5174      | Western Blot (WB)                | WB: 1:1000                                                     |
| B-TUBULIN   | Abcam                        | ab6046           | Western Blot (WB)                | WB: 1:10000                                                    |
| FLAG        | Sigma                        | F3165            | Western Blot (WB)                | WB: 1:1000                                                     |
| ISL1/2      | Developmental Hybridoma Bank | N/A              | Western Blot (WB)                | WB: 1:250                                                      |
| LHX3        | Developmental Hybridoma Bank | N/A              | Western Blot (WB)                | WB: 1:250                                                      |
| Histone H3  | Abcam                        | ab1791           | Western Blot (WB)                | WB: 1:5000                                                     |
| SMC1        | Bethyl Laboratories          | A300-055A        | Western Blot (WB)                | WB: 1:1000                                                     |
| H2Av        | Active Motif                 | 39715            | ChIP                             | 0.2ul/ug Drosophila chromatin per ChIP                         |
| STAG1 / SA1 | Abcam                        | ab4457           | Western Blot (WB)                | WB: 1:1000                                                     |
| VINCULIN    | Cell Signalling              | 13901            | Western Blot (WB)                | WB: 1:1000                                                     |

168

169

170

**Table S2.** List of oligos and antibodies

TABLE S3

CRISPR LIBRARY PREPARATION PRIMERS, PLASMIDS

| Primers for CRISPR Library Preparation                    |                                                                                                     |
|-----------------------------------------------------------|-----------------------------------------------------------------------------------------------------|
| PCR1 primers for amplification of gRNAs from genomic DNA* |                                                                                                     |
| <b>Primer Name</b>                                        | <b>Sequence</b>                                                                                     |
| lentiCRISPR.F1                                            | AATGGACTATCATATGCTTACCGTAACTTGAAAGTATTTTCG                                                          |
| lentiCRISPR.R1                                            | CTTTAGTTTGTATGTCGTGTTGCTATTATGCTACTATTCTTTCC                                                        |
| PCR2 primers for deep sequencing*                         |                                                                                                     |
| <b>Primer Name</b>                                        | <b>Sequence</b>                                                                                     |
| IlluP5.1.bar.F1                                           | AATGATACGGCGACCACCGAGATCTACACTCTTTCCCTACACGACGCTCTTCCGATCTLAAGTAGAGtcttctggaagggacgaaacaccg         |
| IlluP5.2.bar.F2                                           | AATGATACGGCGACCACCGAGATCTACACTCTTTCCCTACACGACGCTCTTCCGATCTatACACGATCtcttctggaagggacgaaacaccg        |
| IlluP5.3.bar.F3                                           | AATGATACGGCGACCACCGAGATCTACACTCTTTCCCTACACGACGCTCTTCCGATCTgatCGCGCGTcttctggaagggacgaaacaccg         |
| IlluP5.4.bar.F4                                           | AATGATACGGCGACCACCGAGATCTACACTCTTTCCCTACACGACGCTCTTCCGATCTcgaTCATGATCGtcttctggaagggacgaaacaccg      |
| IlluP5.5.bar.F5                                           | AATGATACGGCGACCACCGAGATCTACACTCTTTCCCTACACGACGCTCTTCCGATCTcgatCGTTACCActtctggaagggacgaaacaccg       |
| IlluP5.6.bar.F6                                           | AATGATACGGCGACCACCGAGATCTACACTCTTTCCCTACACGACGCTCTTCCGATCTatcgaTCCTTGGTcttctggaagggacgaaacaccg      |
| IlluP5.7.bar.F7                                           | AATGATACGGCGACCACCGAGATCTACACTCTTTCCCTACACGACGCTCTTCCGATCTgatgatAACGCATtcttctggaagggacgaaacaccg     |
| IlluP5.8.bar.F8                                           | AATGATACGGCGACCACCGAGATCTACACTCTTTCCCTACACGACGCTCTTCCGATCTcgaTCATGATCGtcttctggaagggacgaaacaccg      |
| IlluP5.9.bar.F9                                           | AATGATACGGCGACCACCGAGATCTACACTCTTTCCCTACACGACGCTCTTCCGATCTacgatcgaTAGGTAAGGtcttctggaagggacgaaacaccg |
| IlluP5.10.bar.F10                                         | AATGATACGGCGACCACCGAGATCTACACTCTTTCCCTACACGACGCTCTTCCGATCTAACAAATGtcttctggaagggacgaaacaccg          |
| IlluP5.2.bar.F11                                          | AATGATACGGCGACCACCGAGATCTACACTCTTTCCCTACACGACGCTCTTCCGATCTatACTGTATCtcttctggaagggacgaaacaccg        |
| IlluP5.3.bar.F12                                          | AATGATACGGCGACCACCGAGATCTACACTCTTTCCCTACACGACGCTCTTCCGATCTgatAGGTCGCActtctggaagggacgaaacaccg        |
| IlluminaP7_R                                              | CAAGCAGAAGACGGCATAACGAGATGTGACTGGAGTTCAGACGCTGTGCTCTTCCGATCTtctactattcttccctgcaactgt                |

Blue: Illumina adaptors including P5 and P7 regions  
 Red: Stagger to increase library complexity  
 Black: Barcode for multiplexing  
 Green: Priming sites  
 \* Primer designs are based on the previous study<sup>14</sup>.

171

| Plasmids/CRISPR Libraries     |                        |
|-------------------------------|------------------------|
| <b>Plasmid/Library Name</b>   | <b>Addgene Numbers</b> |
| lentiCas9-blast               | Addgene: 52962         |
| lentiGuide-puro               | Addgene: 52963         |
| pSpCas9(BB)-2A-GFP (PX458)    | Addgene: 48138         |
| GeCKO mouse library v2 (A, B) | Addgene: 100000053     |
| CbetaSpA (CβF)                | Addgene: 32104         |

172

173 **Table S3.** List of primers for CRISPR library preparation and plasmids

174

175

176

177

**TABLE S4**

**CUT-OFF VALUES FOR TRANSCRIPTION FACTOR ACTIVITY AT HI-C LOOP ANCHORS**

| <b>Cut-off Values for Transcription Factor Activity at Hi-C Loop Anchors</b> |                                    |                            |
|------------------------------------------------------------------------------|------------------------------------|----------------------------|
|                                                                              | <b>Embryonic Stem Cells (ESCs)</b> | <b>Motor Neurons (MNs)</b> |
| CTCF ChIP-seq                                                                | 30                                 | 40                         |
| MAZ ChIP-seq                                                                 | 7.5                                | 8                          |

**Table S4.** Cut-off values for transcription factor activity at Hi-C loop anchors in ESCs and MNs

**TABLE S5****OLIGOS FOR EMSA PROBES**

| EMSA Probes           |                                                                  |
|-----------------------|------------------------------------------------------------------|
| Primer Name           | Sequence                                                         |
| maz.hoxa56.WT.emsa.F  | GGAGTTGGGTGGAGGCAAGAGGGTGGCGCGCGCCCTG                            |
| maz.hoxa56.WT.emsa.R  | CAGGGCGCGCGGCCACCCCTTGCCTCCACCCAATCC                             |
| maz.hoxa56.MUT.emsa.F | GGAGTTGGGTATTTCGAAGAATTCTGGCGCGCGCCCTG                           |
| maz.hoxa56.MUT.emsa.R | CAGGGCGCGCGCCAGAATTCTTGGCAATACCCAATCC                            |
| maz.hoxd48.emsa.F     | CCTGGGTGGGAGGGGAATGGGAGGACACAAGAGCCACCCGTCTTCTGCCCCGCTTCCACCTCAG |
| maz.hoxd48.emsa.R     | CTGAGGTGGAAGGCGGGCAGAAGAACGGGTGGCTCTTGTGTCTCCATTCCCTCCACCCAGG    |
| maz.hoxd48.MUT.emsa.F | CCTGGGTGGGAATCCAATGGGAATTCACAAGAGCCACCCGTCTTCTGATTGCTTCCACCTCAG  |
| maz.hoxd48.MUT.emsa.R | CTGAGGTGGAAGGCGAATCAGAAGAACGGGTGGCTCTTGTGAATCCATTGGATTCCACCCAGG  |

**Table S5.** List of oligos used as EMSA probes

**TABLE S6****4C PRIMERS**

| 4C PRIMERS    |                                                                                      |
|---------------|--------------------------------------------------------------------------------------|
| Primer Name   | Sequence                                                                             |
| 4C-pre5.2-F1  | AATGATACGGCGACCACCGAGATCTACACTCTTTCCTACACGACGCTCTCCGATCTTCGCTTAGTATCTGTGAATGCAGATC   |
| 4C-pre5.2-F2  | AATGATACGGCGACCACCGAGATCTACACTCTTTCCTACACGACGCTCTCCGATCTAGAAGTAGTATCTGTGAATGCAGATC   |
| 4C-pre5.2-F3  | AATGATACGGCGACCACCGAGATCTACACTCTTTCCTACACGACGCTCTCCGATCTAGCGACAGTATCTGTGAATGCAGATC   |
| 4C-pre5.2-F4  | AATGATACGGCGACCACCGAGATCTACACTCTTTCCTACACGACGCTCTCCGATCTCCAATTAGTATCTGTGAATGCAGATC   |
| 4C-pre5.2-F5  | AATGATACGGCGACCACCGAGATCTACACTCTTTCCTACACGACGCTCTCCGATCTCCGTAGAGTATCTGTGAATGCAGATC   |
| 4C-pre5.2-F6  | AATGATACGGCGACCACCGAGATCTACACTCTTTCCTACACGACGCTCTCCGATCTGGACTTAGTATCTGTGAATGCAGATC   |
| 4C-pre5.2-F7  | AATGATACGGCGACCACCGAGATCTACACTCTTTCCTACACGACGCTCTCCGATCTTATAGCAGTATCTGTGAATGCAGATC   |
| 4C-pre5.2-F8  | AATGATACGGCGACCACCGAGATCTACACTCTTTCCTACACGACGCTCTCCGATCTAACTAGAGTATCTGTGAATGCAGATC   |
| 4C-pre5.2-F9  | AATGATACGGCGACCACCGAGATCTACACTCTTTCCTACACGACGCTCTCCGATCTCATGACAGTATCTGTGAATGCAGATC   |
| 4C-pre5.2-F10 | AATGATACGGCGACCACCGAGATCTACACTCTTTCCTACACGACGCTCTCCGATCTGIGTATAGTATCTGTGAATGCAGATC   |
| 4C-pre5.2-F11 | AATGATACGGCGACCACCGAGATCTACACTCTTTCCTACACGACGCTCTCCGATCTATCTGCAGTATCTGTGAATGCAGATC   |
| 4C-pre5.2-F12 | AATGATACGGCGACCACCGAGATCTACACTCTTTCCTACACGACGCTCTCCGATCTTGGTCAGTATCTGTGAATGCAGATC    |
| 4C-pre5.2-R   | CAAGCAGAAGACGGCATAACGAGATAGGTCGACGTGACTGGAGTTCAGACGTGTGCTCTCCGATCTAGGCGGGATTCTGAAGTT |

**Red:** Illumina adapter

**Black:** Barcodes

**Green:** Primers

\*4C-seq primer designs are based on the previous study<sup>13</sup>.

**Table S6.** List of primers for 4C-seq

178

179

180

181

182

183

184  
185  
186  
187  
188  
189  
190  
191  
192  
193  
194  
195  
196  
197  
198  
199  
200

**Supplementary Dataset Captions**

**Supplementary Dataset 1. (separate file)**

Essential genes in ESCs (**Supplementary Dataset 1a**) and essential/differentiation related genes in MNs (**Supplementary Dataset 1b**) identified via genome-wide CRISPR screens

**Supplementary Dataset 2. (separate file)**

Candidates identified to influence CTCF boundary in genome-wide CRISPR screens

**Supplementary Dataset 3. (separate file)**

Common candidates identified to influence CTCF boundary in independent sub-library screens

**Supplementary Dataset 4. (separate file)**

Peptide counts in native FLAG-CTCF ChIP-MS in ESCs and MNs

**Supplementary Dataset 5. (separate file)**

Common candidates identified to influence CTCF boundary in genome-wide CRISPR screens and ChIP-mass spectrometry

**Supplementary Dataset 6. (separate file)**

List of sgRNAs in the custom library

**Supplementary Dataset 7. (separate file)**

List of genes identified in secondary screens in WT background



201 **Supplementary Dataset 8. (separate file)**

202 List of genes identified in secondary screens in CTCF site deletion background

203 **Supplementary Dataset 9. (separate file)**

204 List of genes uniquely identified in secondary screens in WT background compared to CTCF site  
205 deletion background

206 **Supplementary Dataset 10. (separate file)**

207 RNA-seq expression values in WT vs MAZ KO ESCs for differentially expressed genes

208 **Supplementary Dataset 11. (separate file)**

209 RNA-seq expression values in WT vs MAZ KO MNs for differentially expressed genes

210 **Supplementary Dataset 12. (separate file)**

211 RT-qPCR data and analysis in WT, MAZ KO, and CTCF ( $\Delta 5|6:6|7$ ) ESCs and MNs

212 **Supplementary Dataset 13. (separate file)**

213 RNA-seq expression values in WT vs MAZ ( $\Delta 5|6$ ) ESCs for differentially expressed genes

214 **Supplementary Dataset 14. (separate file)**

215 RNA-seq expression values in WT vs MAZ ( $\Delta 5|6$ ) MNs for differentially expressed genes

216

217

218

219

220

221 **References**

- 222 1. Duboule, D. & Morata, G. Colinearity and Functional Hierarchy among Genes of the  
223 Homeotic Complexes. *Trends in Genetics* **10**, 358-364 (1994).
- 224 2. Kmita, M. & Duboule, D. Organizing axes in time and space; 25 years of colinear tinkering.  
225 *Science* **301**, 331-3 (2003).
- 226 3. Doench, J.G. *et al.* Optimized sgRNA design to maximize activity and minimize off-target  
227 effects of CRISPR-Cas9. *Nat Biotechnol* **34**, 184-191 (2016).
- 228 4. Kagey, M.H. *et al.* Mediator and cohesin connect gene expression and chromatin  
229 architecture. *Nature* **467**, 430-5 (2010).
- 230 5. Zuin, J. *et al.* A cohesin-independent role for NIPBL at promoters provides insights in  
231 CdLS. *PLoS Genet* **10**, e1004153 (2014).
- 232 6. Song, J. *et al.* Two consecutive zinc fingers in Sp1 and in MAZ are essential for interactions  
233 with cis-elements. *J Biol Chem* **276**, 30429-34 (2001).
- 234 7. Busslinger, G.A. *et al.* Cohesin is positioned in mammalian genomes by transcription,  
235 CTCF and Wapl. *Nature* **544**, 503-507 (2017).
- 236 8. Xiao, T., Li, X. & Felsenfeld, G. The Myc-associated zinc finger protein (MAZ) works  
237 together with CTCF to control cohesin positioning and genome organization. *Proc Natl*  
238 *Acad Sci U S A* **118**(2021).
- 239 9. Thiecke, M.J. *et al.* Cohesin-Dependent and -Independent Mechanisms Mediate  
240 Chromosomal Contacts between Promoters and Enhancers. *Cell Rep* **32**, 107929 (2020).
- 241 10. Wellik, D.M. Hox genes and kidney development. *Pediatr Nephrol* **26**, 1559-65 (2011).
- 242 11. Di-Poï, N., Zákány, J. & Duboule, D. Distinct Roles and Regulations for Hoxd Genes in  
243 Metanephric Kidney Development. *PLoS Genetics* **preprint**(2005).

- 244 12. Cavalleiro, G.R., Pollex, T. & Furlong, E.E. To loop or not to loop: what is the role of  
245 TADs in enhancer function and gene regulation? *Curr Opin Genet Dev* **67**, 119-129 (2021).
- 246 13. Narendra, V.R., P.P. ; An, D.; Raviram, R.; Skok, J.A.; Mazzoni, E.O.; Reinberg, D. CTCF  
247 establishes discrete functional chromatin domains at the Hox clusters during  
248 differentiation. *Science* **347**, 1017-21 (2015).
- 249 14. Shalem, O. *et al.* Genome-scale CRISPR-Cas9 knockout screening in human cells. *Science*  
250 **343**, 84-7 (2014).

251

252
