# Supplementary material for: CRISPR and biochemical screens identify MAZ as a cofactor in CTCF-mediated insulation at Hox clusters
Source: PubMed Central journal article supplement (PMC8837555; doi:10.1038/s41588-021-01008-5), 2022-02-10

# Extended Data Figure 1

## Extended Data Figure 1e

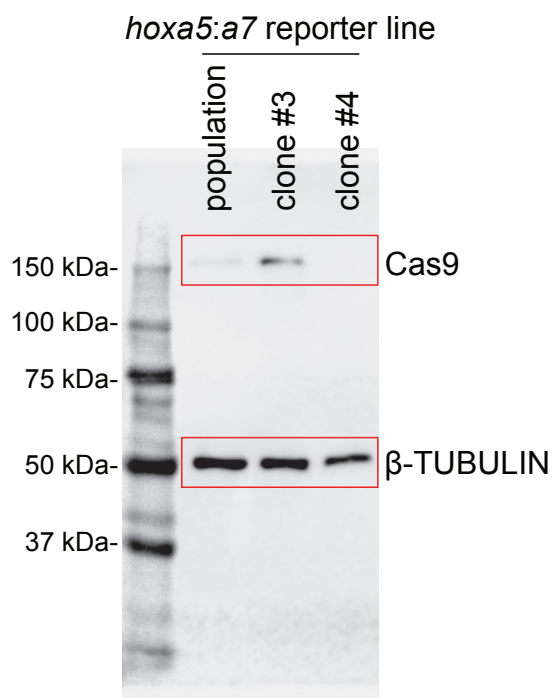

Supplement: 41588_2021_1008_MOESM5_ESM.pdf [file 41588_2021_1008_MOESM5_ESM.pdf]
