# Supplementary material for: CRISPR and biochemical screens identify MAZ as a cofactor in CTCF-mediated insulation at Hox clusters
Source: PubMed Central journal article supplement (PMC8837555; doi:10.1038/s41588-021-01008-5), 2022-02-10

## Extended Data Figure 2

### Extended Data Figure S2b

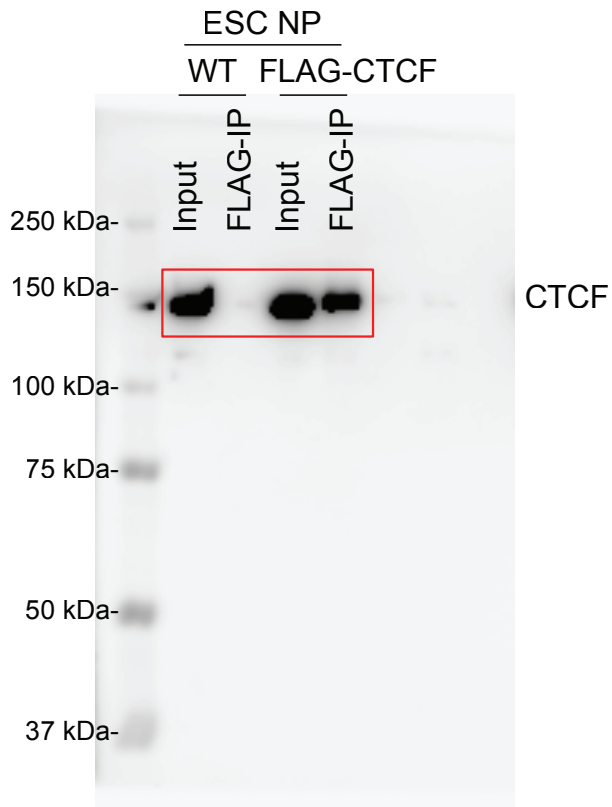

## Extended Data Figure S2e

### ESC blots (left)

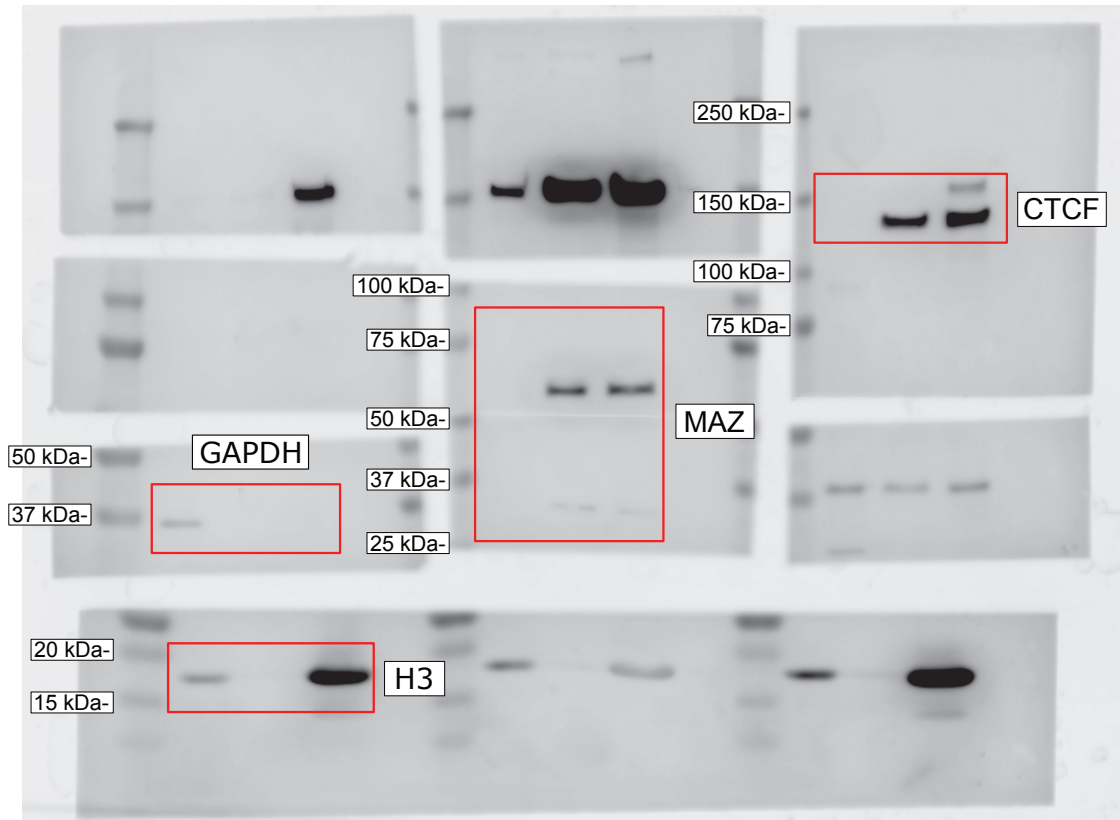

### MN blots (right)

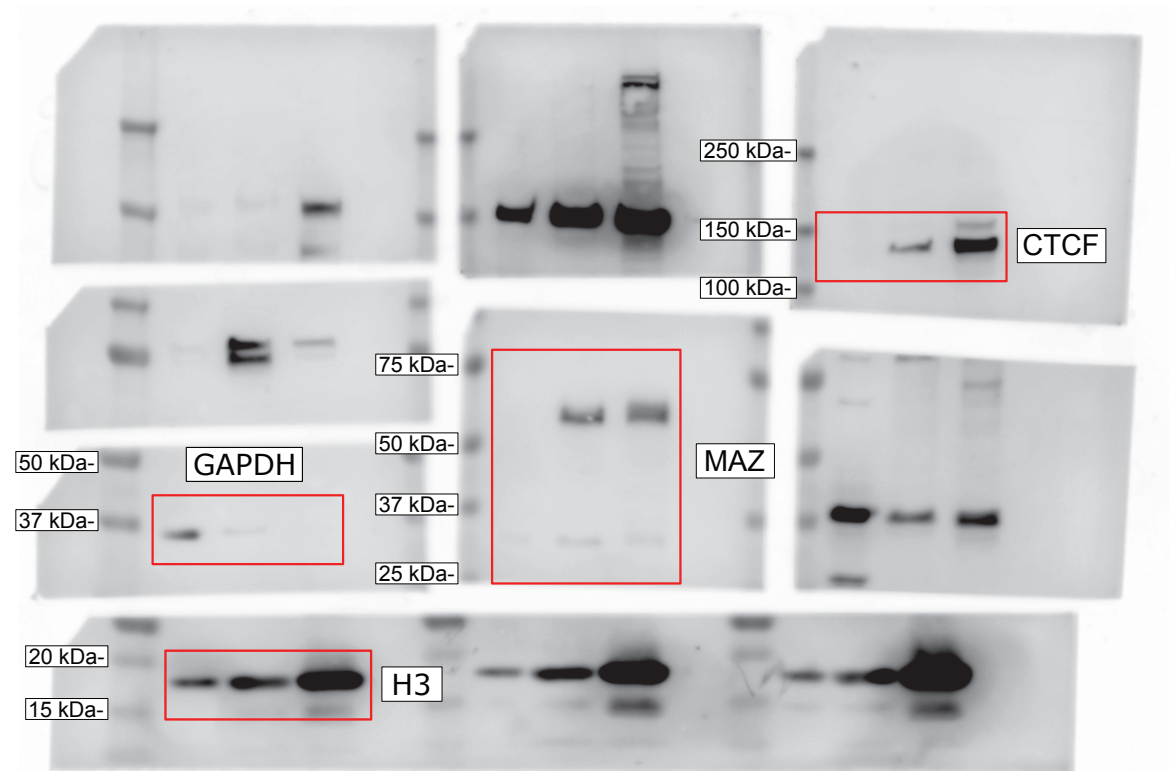

**Figure S2f**

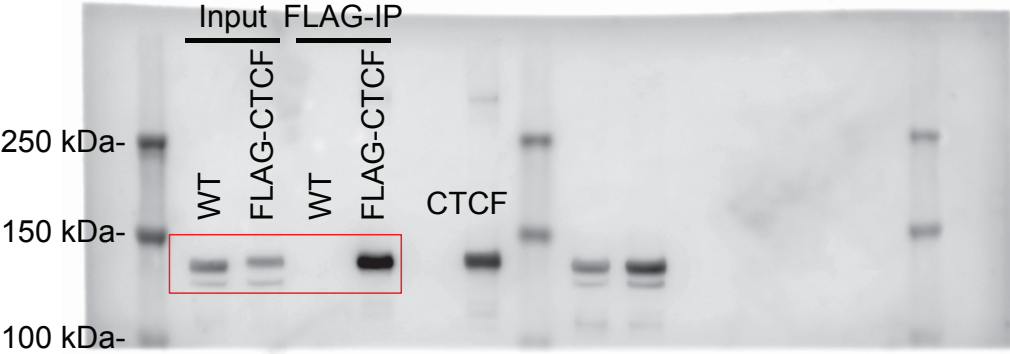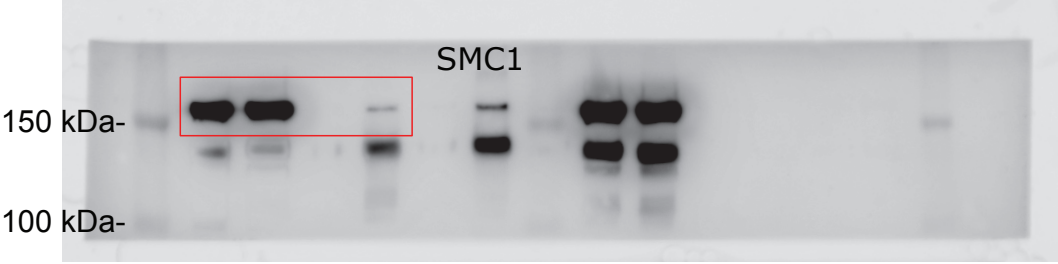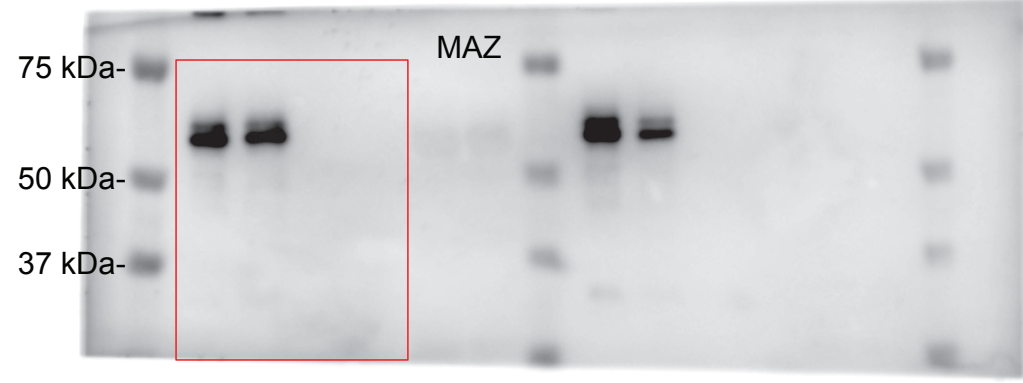

**Figure S2g**

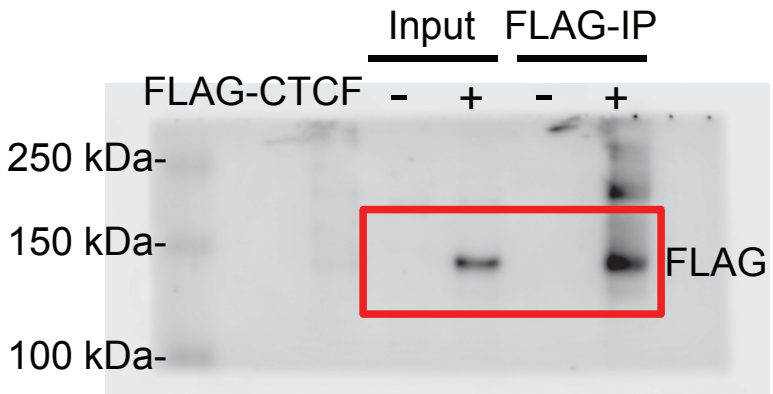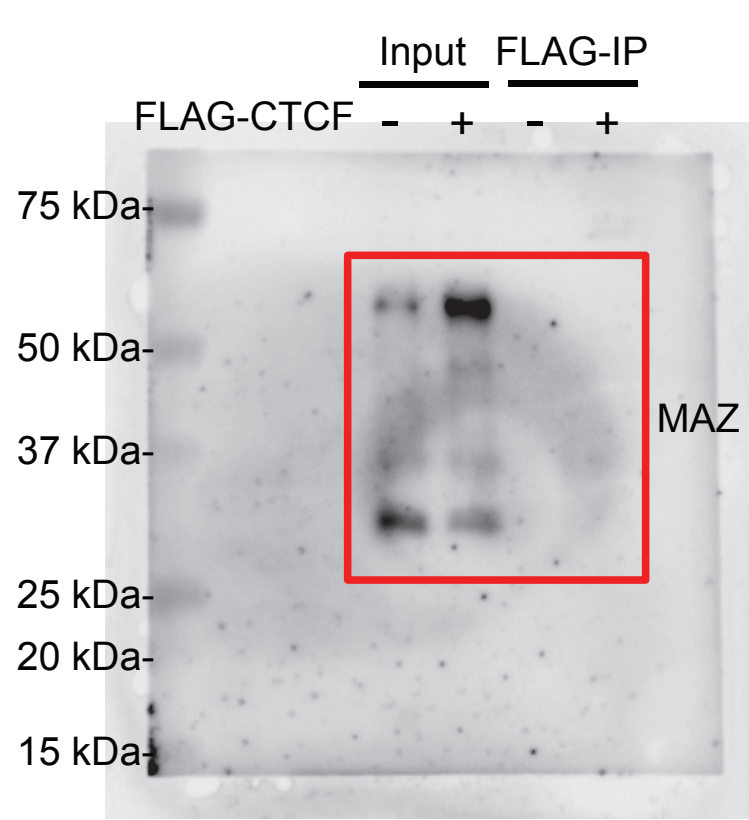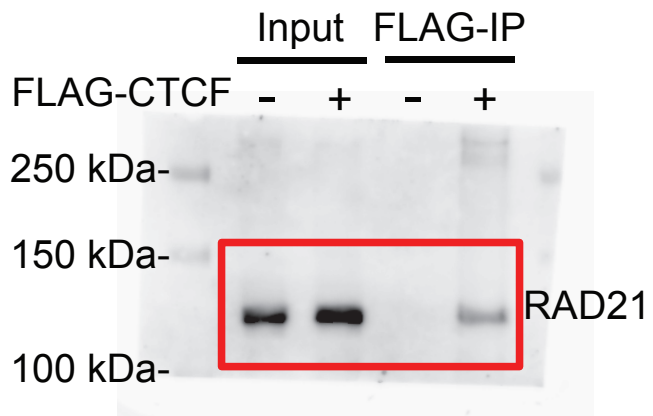

Supplement: 41588_2021_1008_MOESM6_ESM.pdf [file 41588_2021_1008_MOESM6_ESM.pdf]
